# Supplementary material for: Magnetic-responsive delivery of drug-carriers using titania nanotube arrays
Source: Royal Society of Chemistry journal article supplement (doi:10.1039/c2jm16819g), 2012-01-01
Supplement: c2jm16819g.pdf [file c2jm16819g.pdf]

## Electronic Supplementary Information (ESI)

# Magnetic-Responsive Delivery of Drug Carriers using Titania Nanotube Arrays

Moom Sinn Aw<sup>a</sup>, Jonas Addai-Mensah<sup>a</sup>, Dusan Losic<sup>a,b\*</sup>

<sup>a</sup>Ian Wark research Institute, University of South Australia, Mawson lakes, Adelaide, 5095 SA, Australia

<sup>b</sup>School of Chemical Engineering, University of Adelaide, Adelaide, 5005 SA, Australia

\* Corresponding author: dusan.losic@adelaide.edu.au

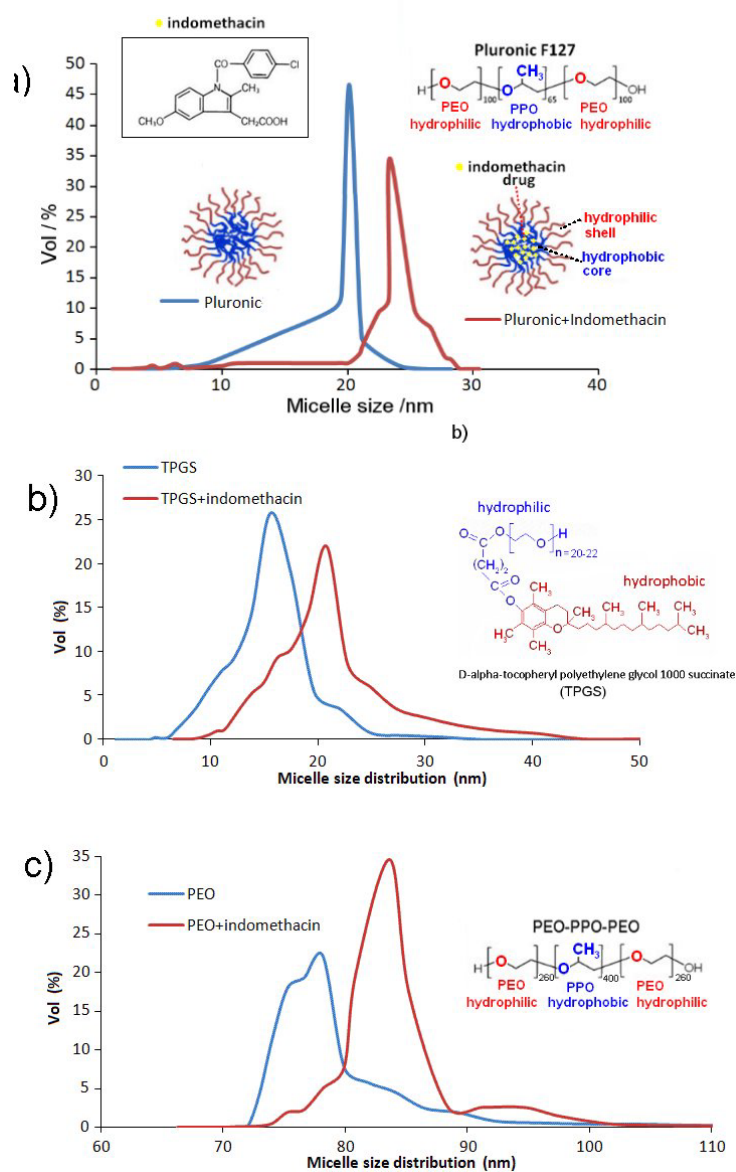

**Figure S 1.** a-c) The size distribution of prepared three different polymer micelles used as drug carriers before and after encapsulation with drug (indomethacin)

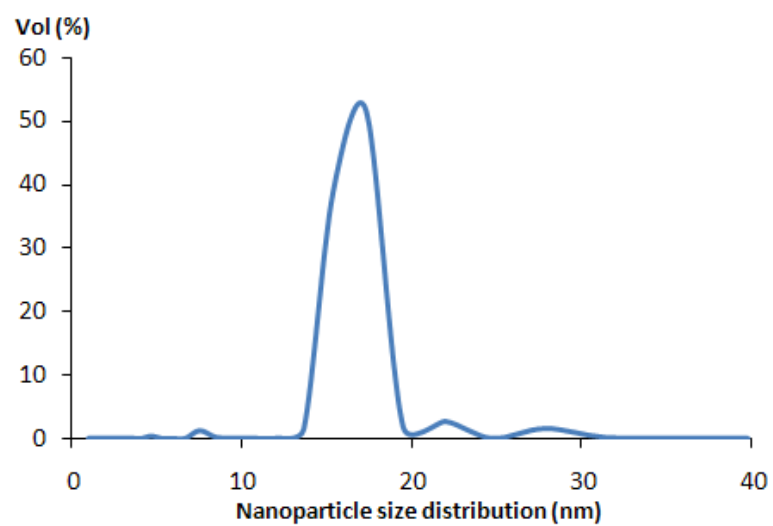

**Fig S2.** Size distribution of dopamine modified iron oxide magnetic nanoparticles used as drug releasing agent.

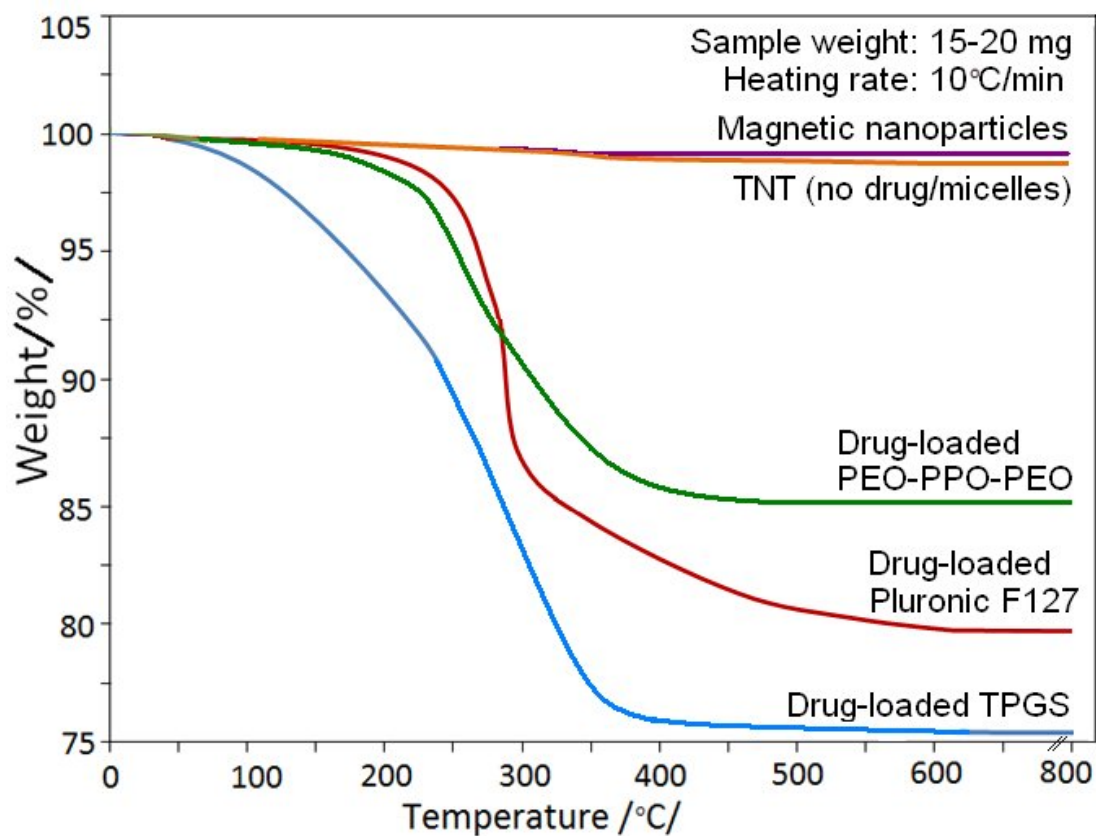

**Fig S3.** TGA for all prepared samples with TNT loaded with three different polymer micelles with drug (indomethacin) and magnetic nanoparticles.
